# Supplementary material
Source: PubMed Central journal article supplement (PMC3638559)
Supplement: Supp_Figure1.pdf [file Supp_Figure1.pdf]

## Supplementary Data

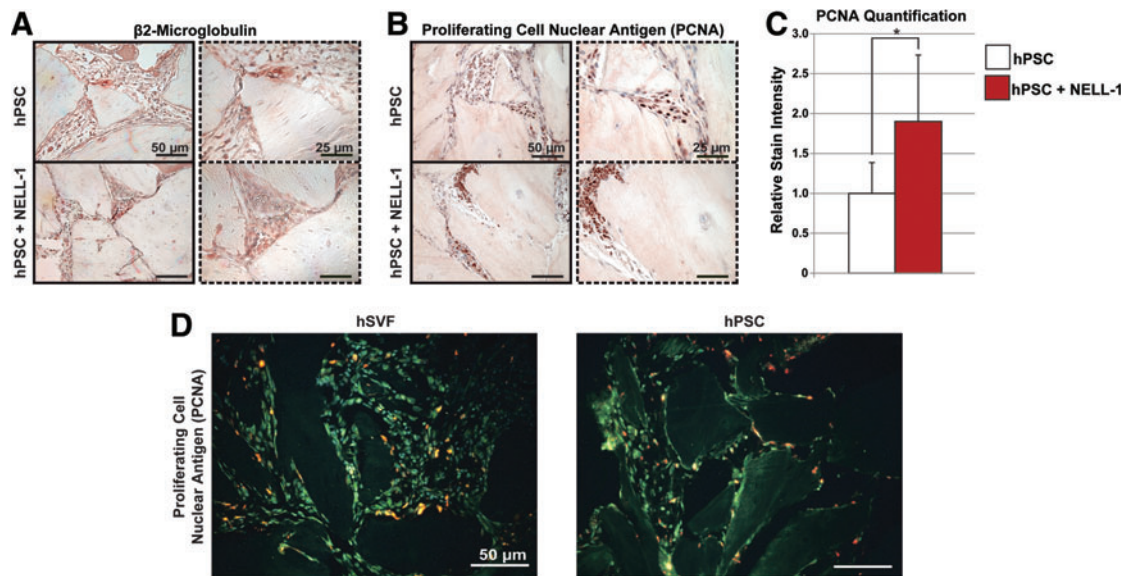

**SUPPLEMENTARY FIG. S1.** Persistence and proliferation of implanted human perivascular stem cells (hPSCs). (A–C) Immunohistochemistry for human  $\beta$ -2 microglobulin immunohistochemistry and human proliferating cell nuclear antigen (PCNA) was performed on hPSC- and hPSC + Nel-like Molecule I (NELL-1)-treated samples. (A) Representative images of  $\beta$ -2 microglobulin immunohistochemistry. (B) Representative images of PCNA immunohistochemistry. (C) Corresponding PCNA relative stain quantification, based on  $n = 10$  ( $400\times$ ) images per group and a magic wand tolerance of 40.  $*p < 0.05$ . (D) Representative images of PCNA immunofluorescent staining, appearing green. Implanted cells were prelabeled with a red fluorochrome to allow *in vivo* tracking.
