# Supplementary material
Source: PubMed Central journal article supplement (PMC3638559)
Supplement: Supp_Table1.pdf [file Supp_Table1.pdf]

SUPPLEMENTARY TABLE S1. IMPLANT CONTENTS AND EXPERIMENTAL NUMBERS

| <i>Experimental group</i> | <i>DBX volume (<math>\mu\text{L}</math>)</i> | <i>Protein concentration (<math>\mu\text{g}/\mu\text{L}</math>)</i> | <i>Protein total dose (<math>\mu\text{g}</math>)</i> | <i>Absolute cell number</i> | <i>N</i> |
|---------------------------|----------------------------------------------|---------------------------------------------------------------------|------------------------------------------------------|-----------------------------|----------|
| Control                   | 100                                          | 0                                                                   | 0                                                    | 0                           | 6        |
| NELL-1                    | 100                                          | 3                                                                   | 300                                                  | 0                           | 7        |
| hPSC                      | 100                                          | 0                                                                   | 0                                                    | $2.5 \times 10^5$           | 10       |
| hPSC + NELL-1             | 100                                          | 3                                                                   | 300                                                  | $2.5 \times 10^5$           | 9        |
| hSVF                      | 100                                          | 0                                                                   | 0                                                    | $2.5 \times 10^5$           | 10       |
| hPSC + BMP2               | 100                                          | 0.0375                                                              | 3.75                                                 | $2.5 \times 10^5$           | 2        |

DBX, demineralized bone matrix; NELL-1, Nel-like molecule, type 1; hPSC, human perivascular stem cells; hSVF, human stromal vascular fraction; BMP2, bone morphogenetic protein 2.
